# Supplementary material for: Optimization of a Protocol for Launching Grapevine Infection with the Biologically Active cDNA Clones of a Virus
Source: MDPI journal article supplement (doi:10.3390/pathogens12111314), 2023-11-03
Supplement: s1 [file s1]

## Article

# Optimization of a Protocol for Launching Grapevine Infection with the Biologically Active cDNA Clones of a Virus

Mehdi Shabanian<sup>1,\*</sup>, Caihong Li<sup>1</sup>, Ali Ebadi<sup>2</sup>, Valerian Dolja<sup>3</sup> and Baozhong Meng<sup>1</sup>

<sup>1</sup> Department of Molecular and Cellular Biology, University of Guelph, Guelph, ON N1G 2W1, Canada; caihong@uoguelph.ca (C.L.); bmeng@uoguelph.ca (B.M.)

<sup>2</sup> Department of Horticulture, College of Agriculture and Natural Resources, University of Tehran, Karaj 31587–11167, Iran; aebadi@ut.ac.ir

<sup>3</sup> Department of Botany and Plant Pathology, Oregon State University, Corvallis, OR 97331, USA; doljav@oregonstate.edu

\* Correspondence: shabania@uoguelph.ca

## Supplemental Tables:

**Citation:** Shabanian, M.; Li, C.; Ebadi, A.; Dolja, V.; Meng, B. Optimization of a Protocol for Launching Grapevine Infection with the Biologically Active cDNA Clones of a Virus. *Pathogens* **2023**, *12*, 1314. <https://doi.org/10.3390/pathogens12111314>

Academic Editors: Kathleen Hefferon and Srividhya Venkataraman

Received: 6 October 2023

Revised: 25 October 2023

Accepted: 30 October 2023

Published: 3 November 2023

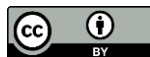

**Copyright:** © 2023 by the authors. Submitted for possible open access publication under the terms and conditions of the Creative Commons Attribution (CC BY) license (<https://creativecommons.org/licenses/by/4.0/>).

**Table S1.** Agar media for all grape stages OH, GS1, GS2 and GS3.

| Media Stage                      | OH medium.         | GS1                | GS2                | GS3                |
|----------------------------------|--------------------|--------------------|--------------------|--------------------|
| Ingredients/1 L                  | pH: 5.7            | pH: 5.3            | pH: 5.3            | pH: 5.3            |
| M & S salts                      | 3.22 g             | 3.22 g             | 3.22 g             | 3.22 g             |
| Thiamine                         | 0.8 mL (0.5 mg/mL) |
| Inositol                         | 0.100 g            | 0.1 g              | 0.025 g            | 0.025 g            |
| Sucrose                          | 7 g                | 20 g               | 15 g               | 12.5 g             |
| BAP                              | –                  | 2 mL (0.5 mg/mL)   | 4 mL (0.5 mg/mL)   | –                  |
| NaH <sub>2</sub> PO <sub>4</sub> | 0.170 g            | –                  | 0.05 g             | –                  |
| Adenine sulfate                  | 0.08 g             | –                  | –                  | –                  |
| IAA                              | –                  | –                  | 0.5 mL (1mg/mL)    | 1 mL (1mg/mL)      |
| Agar                             | 3 g                | 2 g                | 2 g                | 1 g                |
| Gelrite                          | –                  | 1.13 g             | 1.2 g              | 1 g                |
| Cefotaxime                       | 0.2 g              | 0.2 g              | 0.2 g              | 0.2 g              |

**Table S2.** Primers were used in this study.

| Primers    | Sequences                             | Amplicon (bp) | Target Gene                                       |
|------------|---------------------------------------|---------------|---------------------------------------------------|
| LR3CP107F  | 5'-TCTTAAARTAYGTTAAGGACGG-3'          | 836           | CP of GLRaV-3                                     |
| LR3CP942R  | 5'-CTAGTTCCTTTTGCAATAGTTG-3'          |               |                                                   |
| LR3_14117F | 5'-GTGCCGGAATCTGAGACTCT-3'            | 211           | CP of GLRaV-3                                     |
| LR3_14327R | 5'-GCCCATAACCTTCTTACACAGC-3'          |               |                                                   |
| LR3_16289F | 5'-GTTTCGGAGACGTATAACATC-3'           | 951           | ORF8 &9 of GLRaV-3                                |
| LR3_17240R | 5'-CTAATCCTCGATTCTCCCCTGAC-3'         |               |                                                   |
| LR3_16896F | 5'-CGCTTAAACGAACGATCAC-3'             | 344           | ORF9 of GLRaV-3                                   |
| LR3_17240R | 5'-CTAATCCTCGATTCTCCCCTGAC-3'         |               |                                                   |
| LR2-C-F    | 5'-AAGGAATACTTAGGCGCCGAC-3'           | 1458          | 3' end region including GFP of GFP-tagged GLRaV-2 |
| LR2-C-R    | 5'-AGGAGCCCCTTTCTGCACCAA-3'           |               |                                                   |
| eGFP-F     | 5'-AAAGGTACCGTGAGCAAGGGCGAGGA-3'      | 720           | eGFP                                              |
| eGFP-R     | 5'-AAAGGATCCTTACTTGTGAGCTCGTCCATGC-3' |               |                                                   |
| ACT-1021F  | 5'-ATCAGGAAGGACCTCTATGG-3'            | 206           | Actin 1 of grapevine                              |
| ACT-1226R  | 5'-ATCCACATCTGCTGGAAGG-3'             |               |                                                   |
